# Supplementary material for: Molecular analysis of myelodysplastic syndrome with isolated deletion of the long arm of chromosome 5 reveals a specific spectrum of molecular mutations with prognostic impact: a study on 123 patients and 27 genes
Source: PubMed Central journal article supplement — Haematologica. 2017 Sep;102(9):1502–10. doi: 10.3324/haematol.2017.166173 (PMC5685225; doi:10.3324/haematol.2017.166173), 2017-09
Supplement: 2017.166173.MEGGENDORFER_SUPPL.pdf [file 2017.166173.MEGGENDORFER_SUPPL.pdf]

# **Molecular analysis of myelodysplastic syndrome with isolated deletion of the long arm of chromosome 5 reveals a specific spectrum of molecular mutations with prognostic impact: a study on 123 patients and 27 genes**

**Manja Meggendorfer, Claudia Haferlach, Wolfgang Kern and Torsten Haferlach**

MLL Munich Leukemia Laboratory, Germany

©2017 Ferrata Storti Foundation. This is an open-access paper. doi:10.3324/haematol.2017.166173

Received: February 8, 2017.

Accepted: June 16, 2017.

Pre-published: June 22, 2017.

Correspondence: manja.meggendorfer@mll.com

---

# Supplement

Molecular analysis of myelodysplastic syndrome with isolated del(5q) reveals a specific spectrum of molecular mutations with prognostic impact: a study on 123 patients and 27 genes

M. Meggendorfer, C. Haferlach, W. Kern, T. Haferlach

## Supplemental Figure 1

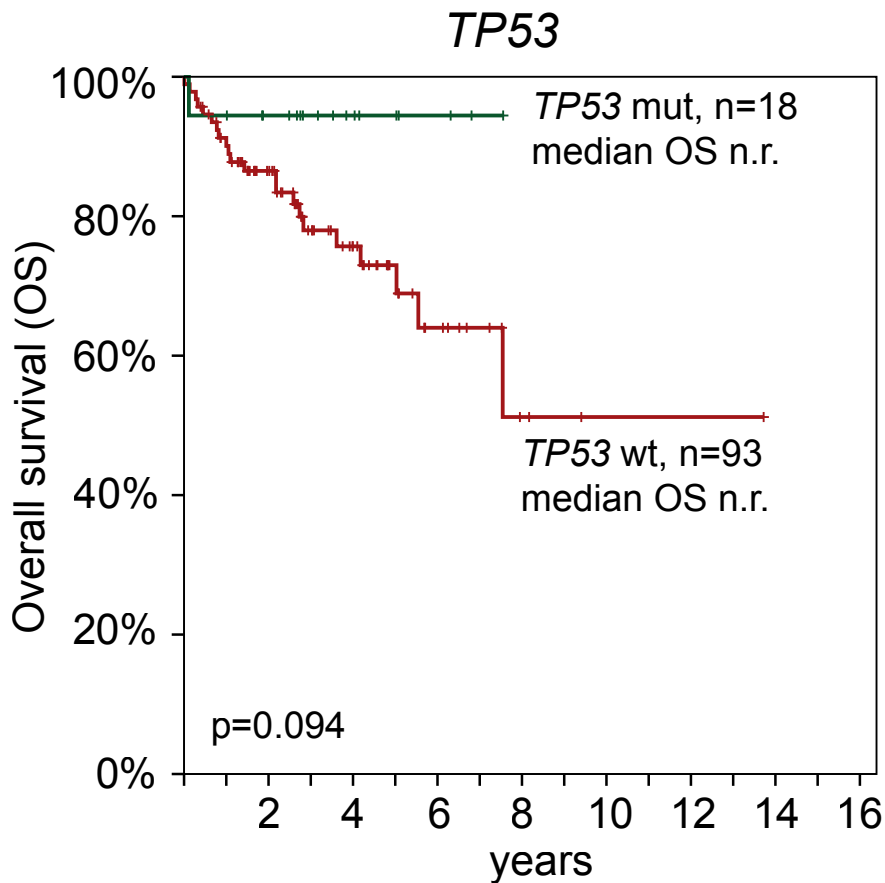

Supplemental figure 1.  
Overall survival (OS) analyses of  
*TP53* mutation in MDS with isolated  
del(5q).  
Case numbers, median OS and  
p-value are given.

Wt: wild type, mut: mutated,  
n.r.: not reached.
