# Supplementary material for: Molecular analysis of myelodysplastic syndrome with isolated deletion of the long arm of chromosome 5 reveals a specific spectrum of molecular mutations with prognostic impact: a study on 123 patients and 27 genes
Source: PubMed Central journal article supplement — Haematologica. 2017 Sep;102(9):1502–10. doi: 10.3324/haematol.2017.166173 (PMC5685225; doi:10.3324/haematol.2017.166173), 2017-09
Supplement: 2017_166173-Disclosures_and_Contributions.pdf [file 2017_166173-Disclosures_and_Contributions.pdf]

Haematologica  
HAEMATOL/2017/166173  
Version 3

Molecular analysis of myelodysplastic syndrome with isolated del(5q)  
reveals a specific spectrum of molecular mutations with prognostic  
impact: a study on 123 patients and 27 genes

Manja Meggendorfer, Claudia Haferlach, Wolfgang Kern, and Torsten  
Haferlach

Disclosures: MM is employed by the MLL Munich Leukemia Laboratory. CH, WK, and TH declare part ownership of the MLL Munich Leukemia Laboratory.

Contributions: MM investigated molecular mutations, analyzed the data and wrote the manuscript. CH was responsible for cytogenetics. WK was involved in data analyses. TH was responsible for cytomorphologic analysis, was the principle investigator of the study. All authors read and contributed to the final version of the manuscript.
